# Supplementary material
Source: Research Square preprint supplement (doi:10.21203/rs.3.rs-9138196/v1)
Supplement: Supplementary file 1 [file e72696ee0e9e00a97e57287c.pdf]

1 **Supplementary Information**

---

2 **Rydberg Atom Sensors Enable High-Resolution Terahertz**  
3 **Frequency Detection and Precision Spectroscopy**

4 **CONTENTS**

- 5
- 6 Supplementary Fig. 1: Theoretical fluorescence and THz-induced EIF spectra by two-step excitation.
- 7 Supplementary Fig. 2: Theoretical fluorescence and THz-induced EIF spectra by three-step excitation.
- 8 Supplementary Fig. 3: Experimental fluorescence spectra and theoretical decay channels.
- 9 Supplementary Fig. 4: THz-induced EIF spectra in the range of 593–600 nm.
- 10 Supplementary Fig. 5: Structure of the deep learning model.
- 11 Supplementary Fig. 6: Detuning of THz-induced EIF at 499.6 nm under magnetic fields.
- 12 Supplementary Fig. 7: Schematic of the metasurface structure, along with simulated resonance
- 13 frequencies and Q factors of the metasurface.
- 14 Supplementary Fig. 8: THz transmission spectrum of the metasurface.
- 15 Supplementary Table 1: Summary of the two-step method for exciting cesium atoms to  $n_2P_{1/2}$  states.
- 16 Supplementary Table 2: Summary of the three-step method for exciting cesium atoms to  $n_2D_{3/2}$  states.
- 17 Supplementary Table 3: Summary of the two-step method for exciting cesium atoms to  $n_2P_{3/2}$  states.

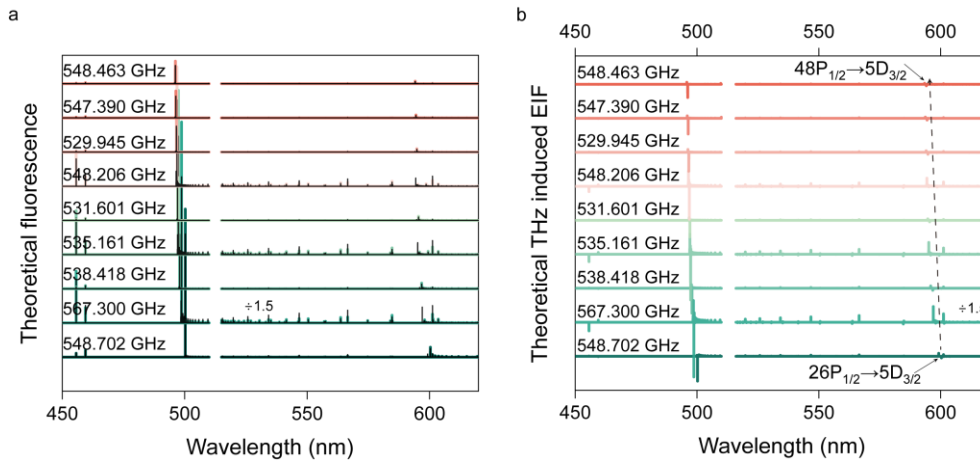

19

20 Fig. S1. (a) Theoretical fluorescence spectra of cesium atoms without (colored) and with (black) a THz  
 21 field in the 450–620 nm range. Theoretical THz transition channels  $n_1R_{a/b} \rightarrow n_2R_{c/d}$  include:  $24D_{3/2} \rightarrow 26P_{1/2}$   
 22 ( $548.702$  GHz),  $29S_{1/2} \rightarrow 30P_{1/2}$  ( $567.300$  GHz),  $30D_{3/2} \rightarrow 33P_{1/2}$  ( $538.418$  GHz),  $34S_{1/2} \rightarrow 36P_{1/2}$  ( $535.161$   
 23 GHz),  $34D_{3/2} \rightarrow 38P_{1/2}$  ( $531.601$  GHz),  $37S_{1/2} \rightarrow 40P_{1/2}$  ( $548.206$  GHz),  $37D_{3/2} \rightarrow 42P_{1/2}$  ( $529.945$  GHz),  
 24  $39D_{3/2} \rightarrow 45P_{1/2}$  ( $537.399$  GHz), and  $41D_{3/2} \rightarrow 48P_{1/2}$  ( $547.463$  GHz), respectively. (b) Theoretical THz-  
 25 induced EIF spectra with nine distinct THz frequencies.

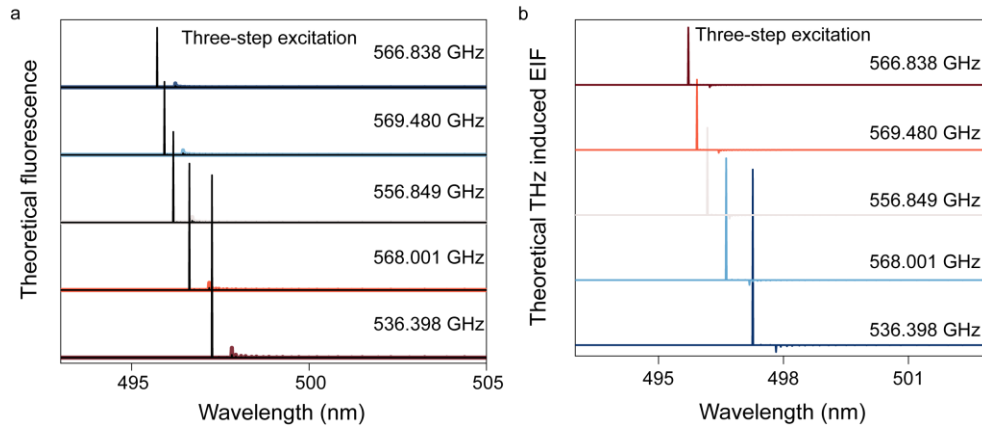

27

28 Fig. S2 (a) Theoretical fluorescence spectra of cesium atoms without (colored) and with (black) a THz field  
 29 by three-step excitation. The THz transition channels  $n_1R_{a/b} \rightarrow n_2R_{c/d}$  include:  $32P_{3/2} \rightarrow 33D_{3/2}$  (536.398  
 30 GHz),  $35P_{3/2} \rightarrow 37D_{3/2}$  (568.001 GHz),  $38P_{3/2} \rightarrow 41D_{3/2}$  (556.849 GHz),  $40P_{3/2} \rightarrow 44D_{3/2}$  (569.480 GHz),  
 31 and  $42P_{3/2} \rightarrow 47D_{3/2}$  (566.838 GHz). (b) Theoretical THz-induced EIF spectra corresponding to the THz  
 32 frequencies.

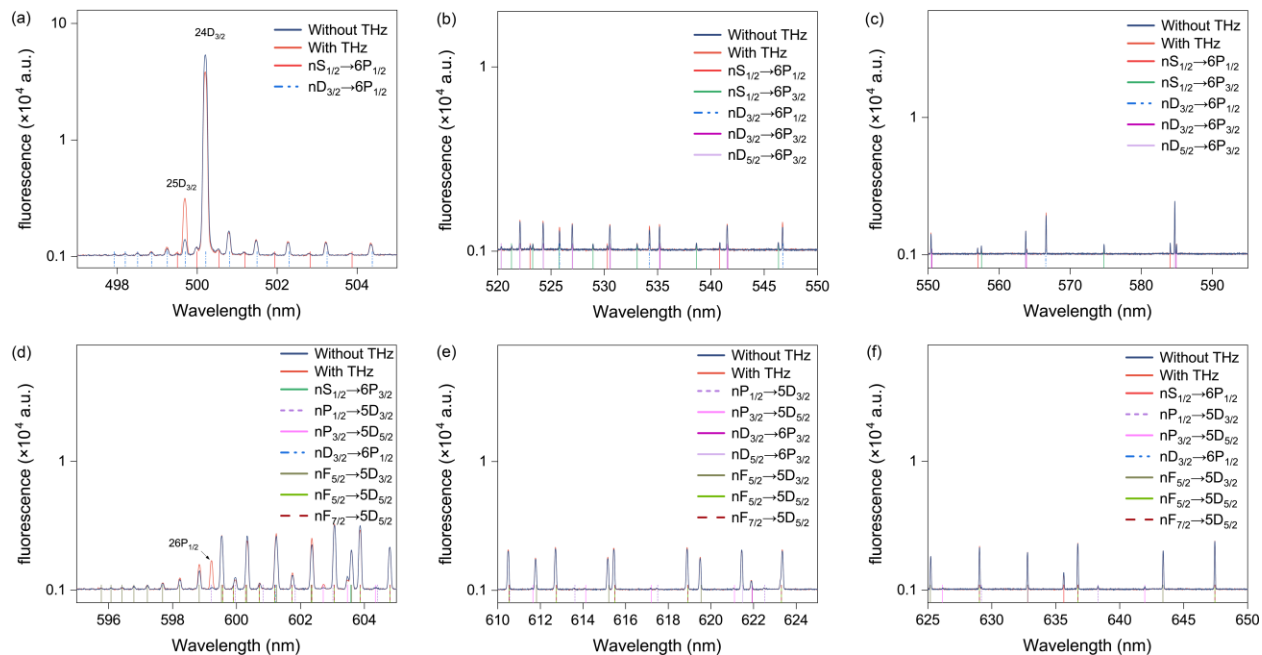

33

34 Fig. S3. Theoretical decay channels and experimental fluorescence spectra of the  $24D_{3/2}$  and  $26P_{1/2}$  states.  
 35 Experimental fluorescence spectra are shown for the wavelength ranges of (a) 495–505 nm, (b) 520–550  
 36 nm, (c) 550–595 nm, (d) 595–605 nm, (e) 610–625 nm, and (f) 625–650 nm. Vertical lines indicate the  
 37 theoretically predicted decay channels.

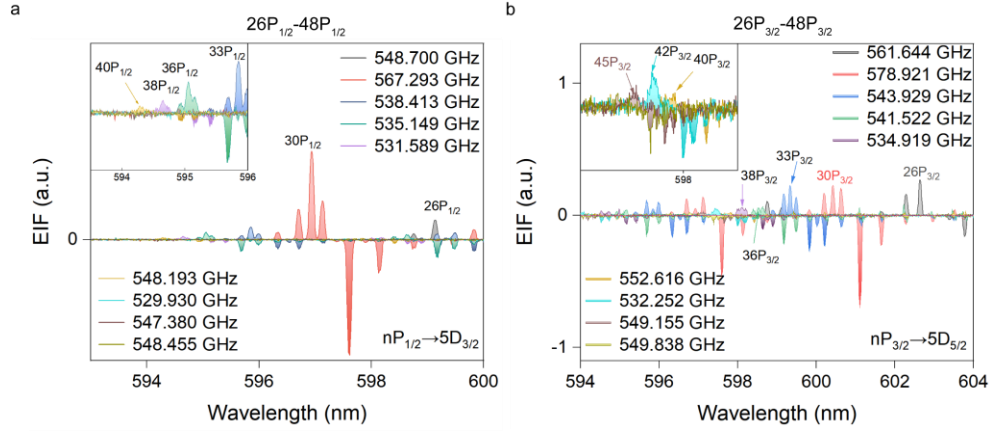

38

39 Fig. S4 (a) THz-induced EIF spectra for the  $26P_{1/2}$ - $48P_{1/2}$  state, covering the wavelength range of 593–600  
 40 nm. Experimental THz frequencies correspond to the following atomic transitions:  $24D_{3/2} \rightarrow 26P_{1/2}$   
 41 ( $548.700$  GHz),  $29S_{1/2} \rightarrow 30P_{1/2}$  ( $546.293$  GHz),  $30D_{3/2} \rightarrow 33P_{1/2}$  ( $538.413$  GHz),  $34S_{1/2} \rightarrow 36P_{1/2}$  ( $535.149$   
 42 GHz),  $34D_{3/2} \rightarrow 38P_{1/2}$  ( $531.589$  GHz),  $37S_{1/2} \rightarrow 40P_{1/2}$  ( $548.193$  GHz),  $37D_{3/2} \rightarrow 42P_{1/2}$  ( $529.930$  GHz),  
 43  $39D_{3/2} \rightarrow 45P_{1/2}$  ( $547.380$  GHz),  $41D_{3/2} \rightarrow 48P_{1/2}$  ( $548.455$  GHz). (b) THz-induced EIF spectra for the  
 44  $26P_{3/2}$ - $48P_{3/2}$  state, covering the wavelength range of 594–604 nm. Experimental THz frequencies  
 45 correspond to the following atomic transitions:  $24D_{5/2} \rightarrow 26P_{3/2}$  ( $561.644$  GHz),  $29S_{1/2} \rightarrow 30P_{3/2}$  ( $578.921$   
 46 GHz),  $30D_{5/2} \rightarrow 33P_{3/2}$  ( $543.929$  GHz),  $34S_{1/2} \rightarrow 36P_{3/2}$  ( $541.522$  GHz),  $34D_{5/2} \rightarrow 38P_{3/2}$  ( $534.919$  GHz),  
 47  $37S_{1/2} \rightarrow 40P_{3/2}$  ( $552.616$  GHz),  $37D_{5/2} \rightarrow 42P_{3/2}$  ( $532.252$  GHz),  $39D_{5/2} \rightarrow 45P_{3/2}$  ( $549.155$  GHz),  $41D_{5/2}$   
 48  $\rightarrow 48P_{3/2}$  ( $549.838$  GHz).

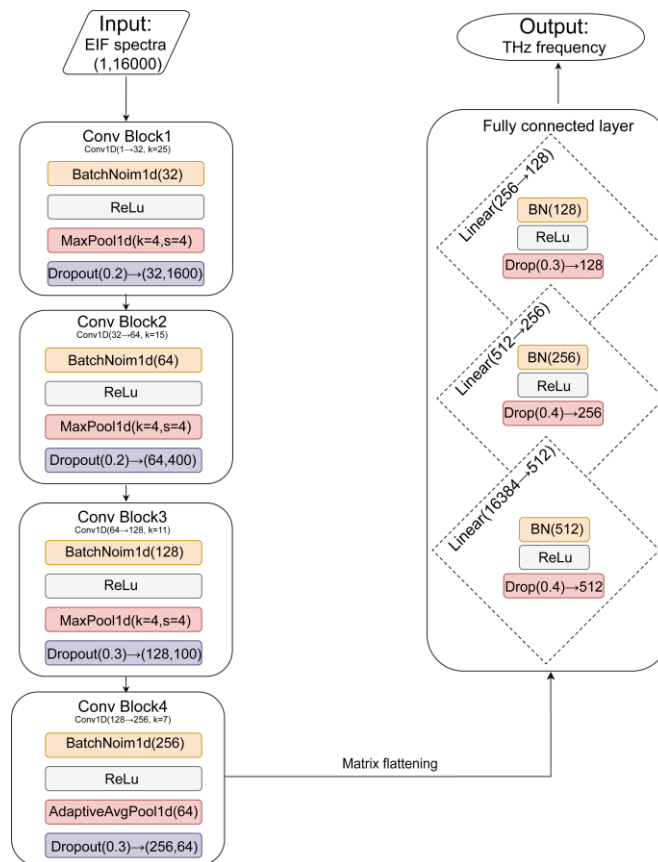

49

50 Fig. S5: Structure of the deep learning model. The model comprises four 1D-CNN, which consists of four  
 51 sublayers: Batch Normalization, ReLU activation, MaxPooling1D, and Dropout. Following these  
 52 convolutional layers, a fully connected layer classifies the EIF spectra and outputs the predicted THz  
 53 frequency.

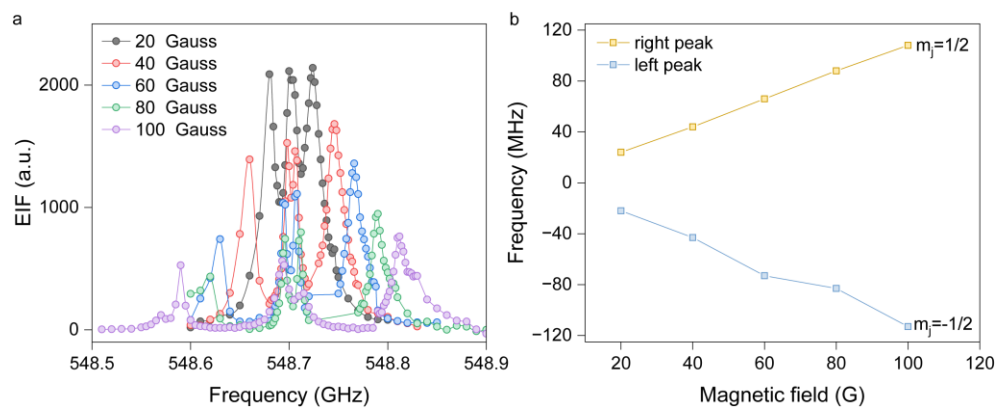

54

55 Fig. S6 (a) Detuning of THz-induced EIF peak at 499.6 nm measured under magnetic fields ranging from  
 56 20 to 100 Gs. (b) Frequency shift of EIF spectral peak in the 20–100 Gs magnetic field range.

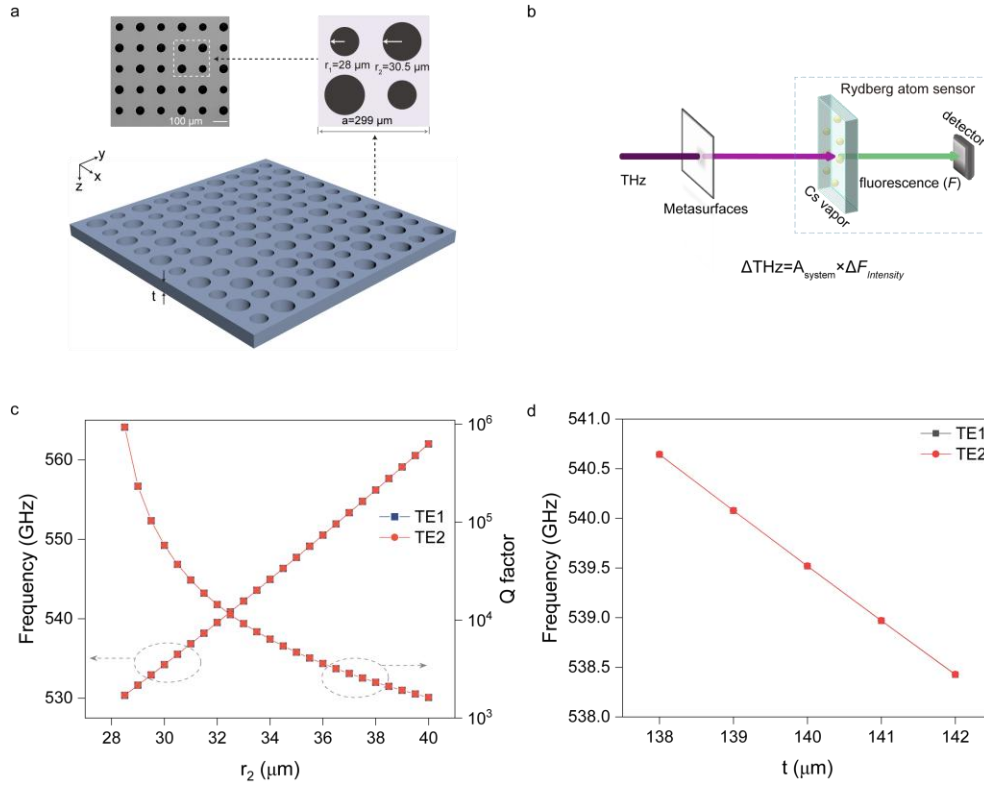

57

58 Fig. S7 (a) SEM images of the fabricated metasurfaces and a schematic of a periodic air-porous all-silicon  
 59 THz metasurface. (b) Schematic of Rydberg atom sensor to characterize THz metasurfaces, featuring a  
 60 divergent THz beam is used in the measurement system. (c) Simulated resonance frequencies and Q factors  
 61 of the TE1 and TE2 modes of the THz metasurface for  $r_1 = 28 \mu\text{m}$ ,  $r_2 = 28\text{--}40 \mu\text{m}$ , and  $a = 306 \mu\text{m}$ . (d)  
 62 Simulated resonance frequencies of the TE1 and TE2 modes of the THz metasurface for  $r_1 = 28 \mu\text{m}$ ,  $r_2 =$   
 63  $32 \mu\text{m}$ , and  $a = 306 \mu\text{m}$  with varying wafer thicknesses  $t$ .

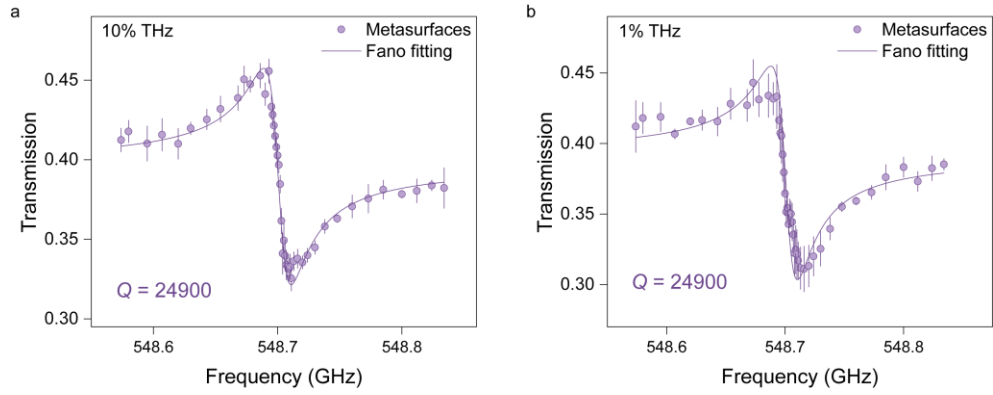

64

65 Fig. S8 The Rydberg-atom sensor measures the THz transmission spectra of the metasurface at (a) 10%  
66 and (b) 1% of the rated THz power.

## 67 Tables

68 **Table 1 Initial Rydberg states  $n_1R_{a/b}$ , final Rydberg states  $n_2R_{1/2}$ , coupling laser wavelengths, dipole**  
 69 **moments, and corresponding THz frequencies from two-step excitation.**

| Energy level      | Coupling laser (nm) | Transition dipole moment | $n_1R_{a/b}$       | THz field (GHz) | Transition dipole moment | $n_2P_{1/2}$       |
|-------------------|---------------------|--------------------------|--------------------|-----------------|--------------------------|--------------------|
| 6P <sub>3/2</sub> | 514.4746            | 0.1154                   | 24D <sub>3/2</sub> | 548.702         | 219.903                  | 26P <sub>1/2</sub> |
|                   | 512.8763            | 0.0406                   | 29S <sub>1/2</sub> | 567.300         | 81.601                   | 30P <sub>1/2</sub> |
|                   | 512.0508            | 0.0792                   | 30D <sub>3/2</sub> | 546.837         | 103.496                  | 33P <sub>1/2</sub> |
|                   | 511.4612            | 0.0307                   | 34S <sub>1/2</sub> | 535.161         | 45.791                   | 36P <sub>1/2</sub> |
|                   | 511.1498            | 0.0644                   | 34D <sub>3/2</sub> | 531.601         | 75.095                   | 38P <sub>1/2</sub> |
|                   | 510.9055            | 0.0266                   | 37S <sub>1/2</sub> | 548.206         | 30.523                   | 40P <sub>1/2</sub> |
|                   | 510.6701            | 0.0561                   | 37D <sub>3/2</sub> | 529.945         | 56.651                   | 42P <sub>1/2</sub> |
|                   | 510.4150            | 0.0515                   | 39D <sub>3/2</sub> | 547.390         | 44.435                   | 45P <sub>1/2</sub> |
|                   | 510.1983            | 0.0475                   | 41D <sub>3/2</sub> | 548.463         | 37.055                   | 48P <sub>1/2</sub> |

70

71 **Table 2 Initial Rydberg states  $n_1R_{a/b}$ , final Rydberg states  $n_2R_{c/d}$ , coupling laser wavelengths, dipole**  
 72 **moments, and corresponding THz frequencies from three-step excitation.**

| Energy level      | Coupling laser (nm) | Transition dipole moment | $n_1R_{a/b}$       | THz field (GHz) | Transition dipole moment | $n_2D_{3/2}$       |
|-------------------|---------------------|--------------------------|--------------------|-----------------|--------------------------|--------------------|
| 7S <sub>1/2</sub> | 785.2208            | 0.02252                  | 32P <sub>3/2</sub> | 536.398         | 80.0168                  | 33D <sub>3/2</sub> |
|                   | 783.7035            | 0.01927                  | 35P <sub>3/2</sub> | 568.000         | 54.6554                  | 37D <sub>3/2</sub> |
|                   | 782.5691            | 0.01674                  | 38P <sub>3/2</sub> | 556.849         | 42.8612                  | 41D <sub>3/2</sub> |
|                   | 781.9647            | 0.01538                  | 40P <sub>3/2</sub> | 569.479         | 34.5032                  | 47D <sub>3/2</sub> |
|                   | 781.4829            | 0.01414                  | 42P <sub>3/2</sub> | 566.838         | 29.1419                  | 47D <sub>3/2</sub> |

73

74 **Table 3 Initial Rydberg states  $n_1R_{a/b}$ , final Rydberg states  $n_2R_{3/2}$ , coupling laser wavelengths, dipole**  
 75 **moments, and corresponding THz frequencies from two-step excitation.**

| Energy level      | Coupling laser (nm) | Transition dipole moment | $n_1R_{a/b}$       | THz field (GHz) | Transition dipole moment | $n_2R_{3/2}$       |
|-------------------|---------------------|--------------------------|--------------------|-----------------|--------------------------|--------------------|
| 6P <sub>3/2</sub> | 514.4693            | 0.1151                   | 24D <sub>5/2</sub> | 561.689         | 203.214                  | 26P <sub>3/2</sub> |
|                   | 512.8763            | 0.0406                   | 29S <sub>1/2</sub> | 578.921         | 91.749                   | 30P <sub>3/2</sub> |
|                   | 512.0483            | 0.0790                   | 30D <sub>5/2</sub> | 543.956         | 105.783                  | 33P <sub>3/2</sub> |
|                   | 511.4612            | 0.0307                   | 34S <sub>1/2</sub> | 541.454         | 53.480                   | 36P <sub>3/2</sub> |
|                   | 511.1481            | 0.0643                   | 34D <sub>5/2</sub> | 534.941         | 72.145                   | 38P <sub>3/2</sub> |
|                   | 510.9055            | 0.0266                   | 37S <sub>1/2</sub> | 552.645         | 36.319                   | 40P <sub>3/2</sub> |
|                   | 510.6693            | 0.0560                   | 37D <sub>5/2</sub> | 532.266         | 54.681                   | 42P <sub>3/2</sub> |
|                   | 510.4139            | 0.0514                   | 39D <sub>5/2</sub> | 549.175         | 43.001                   | 45P <sub>3/2</sub> |
|                   | 510.1974            | 0.0474                   | 41D <sub>5/2</sub> | 549.859         | 35.932                   | 48P <sub>3/2</sub> |

76
